# Supplementary material
Source: Springer Nature journal article supplement (http://www.springermedizin.de/resource/supplementary/12876_2008_273_MOESM2_ESM.pdf/9439066)

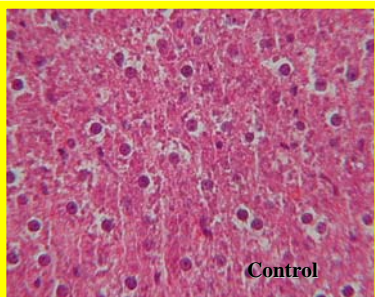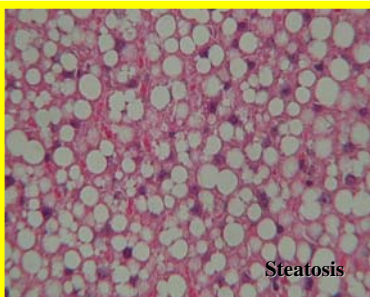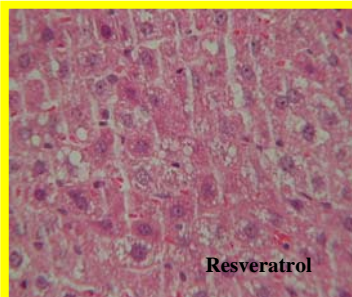

Supplement: MOESM2 [file 9439066]
